# Supplementary material for: Whole-transcriptome analysis of flow-sorted cervical cancer samples reveals that B cell expressed TCL1A is correlated with improved survival
Source: PubMed Central journal article supplement (PMC4770729; doi:10.18632/oncotarget.4526), 2015-06-19
Supplement: oncotarget-06-38681-s001.pdf [file oncotarget-06-38681-s001.pdf]

# Whole-transcriptome analysis of flow-sorted cervical cancer samples reveals that B cell expressed TCL1A is correlated with improved survival

## Supplementary Material

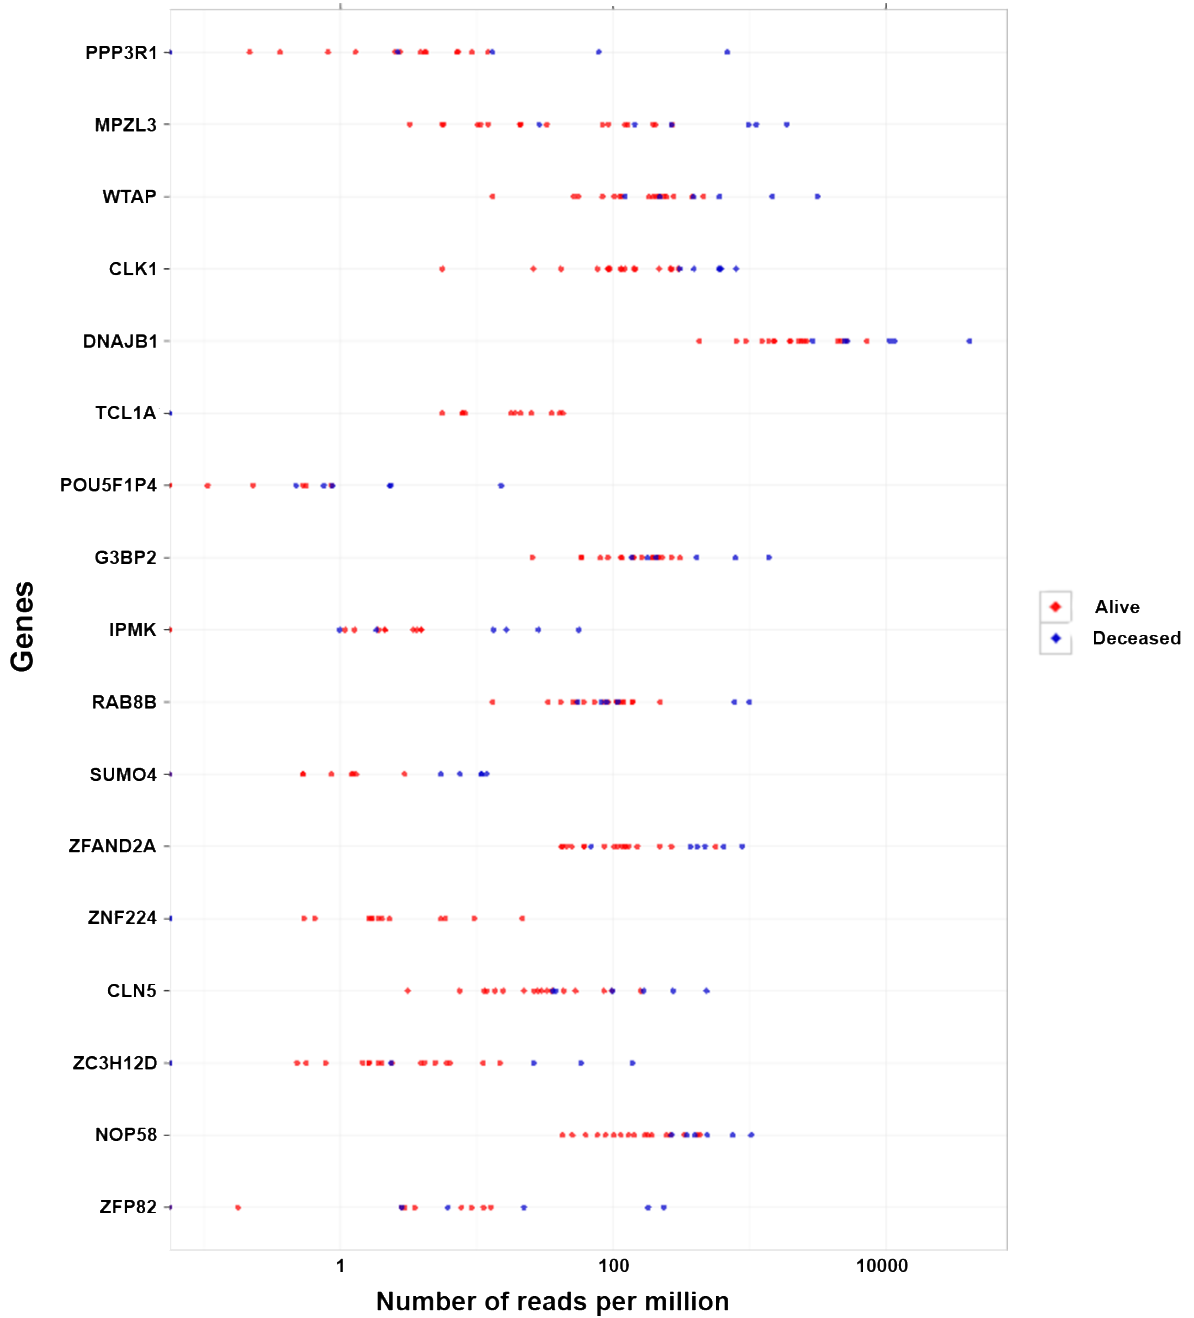

Supplemental Figure S1. Genes differentially expressed within the immune cell fractions based on patient survival status.

The genes significantly differentially expressed in the tumor-infiltrating immune cell fractions between patients who were alive (red dots) and patients who were deceased (blue dots) are shown. The gene with the lowest p value (*PPP3R1*) is shown at the top.
